# Supplementary material for: Efficient direct conversion of methane into methanol on CuZn hetero-diatomic catalysts with certain coordination spheres: a DFT study
Source: Royal Society of Chemistry journal article supplement (doi:10.1039/d2cp03223f), 2022-01-01
Supplement: d2cp03223f1.pdf [file d2cp03223f1.pdf]

# Electronic Supplementary Information

## **Efficiently direct methane to methanol on CuZn hetero- diatomic catalysts with certain coordination spheres: A DFT study**

Chunhua Yang,<sup>a</sup> Cailong Liu,<sup>b</sup> Yuxiu Wang,<sup>c</sup> He-Na Zhang,<sup>a</sup> Qi-Wen He,<sup>a</sup> Dai-Song  
Tang<sup>a</sup> and Xiao-Chun Wang<sup>\*a</sup>

<sup>a</sup> *Institute of Atomic and Molecular Physics, Jilin University, Changchun, 130012,  
P.R. China.*

<sup>b</sup> *School of Physics Science and Information Technology, Liaocheng University,  
Liaocheng, 252000, P.R. China.*

<sup>c</sup> *School of Ecology and Environment, Yuzhang Normal University, Nanchang,  
330103, P.R. China.*

\*Corresponding Author: [wangxiaochun@jlu.edu.cn](mailto:wangxiaochun@jlu.edu.cn)

### Formation energy ( $E_f$ ), binding energy ( $E_b$ ) and dissolution potential ( $U_{diss}$ )

In order to adopt the optimal coordination configurations of the CuZn atoms embedded in nitrogen-decorative graphene, the formation energy ( $E_f$ ) of CuZn-NG is calculated by using the Eq. S1 [S1,S2]:

$$E_f = E_{CuZn-NG} + 10 \mu_C - (E_{Gra} + 6\mu_N + \mu_{Cu} + \mu_{Zn}) \quad (\text{Eq. S1})$$

where  $E_{CuZn-NG}$  is the total energy of CuZn-NG,  $E_{Gra}$  is the total energy of the pristine 6×6 graphene supercell and  $\mu_C$  is the chemical potential of C atom [S3,S4], and  $\mu_N$  is the chemical potential of N atom taken from a  $N_2$  molecule in the gas phase [S5].  $\mu_{Cu}$  and  $\mu_{Zn}$  are the chemical potentials of Cu and Zn atoms, respectively [S6].

In order to verify that the combination of CuZn atoms is favorable, the binding energy ( ) between the two Cu atoms or two Zn atoms or CuZn atoms and the substrate is studied and defined as Eq. S2 [S7]:

$$E_b = E_{CuZn-NG} - E_{Cu} - E_{Zn} \quad (\text{Eq. S2})$$

where and represent the total energies of CuZn-NG and NG, respectively,

/ is the total energy of a Cu/Zn atom in the most stable bulk structure.

In addition, to evaluate the stability of the system in electrode working conditions, the dissolution potential ( ) is calculated as Eq. S3 [S8]:

$$U_{diss} = U_{diss}^0(\text{metal, bulk}) - E_b/N_e \quad (\text{Eq. S3})$$

where (metal, bulk) is the standard dissolution potential of the bulk metal, is the number of transferred electrons during the dissolution.

**Table S1** Binding energy ( ), standard dissolution potentials ( ) of metals, number of transferred electrons ( ) during the dissolution and dissolution potential ( ) of metals.

| Species                | (eV)  | (V)        |     | (V)       |
|------------------------|-------|------------|-----|-----------|
| CuCu-N <sub>P</sub> G  | -1.99 | 0.34       | 2   | 0.84      |
| ZnZn-N <sub>P</sub> G  | -3.15 | -0.76      | 2   | 0.03      |
| CuZn-N <sub>P</sub> G  | -2.94 | 0.34/-0.76 | 2/2 | 0.37/0.08 |
| CuCu-N <sub>PA</sub> G | -4.17 | 0.34       | 2   | 1.38      |
| ZnZn-N <sub>PA</sub> G | -5.22 | -0.76      | 2   | 0.55      |
| CuZn-N <sub>PA</sub> G | -5.01 | 0.34/-0.76 | 2/2 | 1.16/0.42 |

**Table S2** The atomic charge ( $|e|$ ) of first CS and second CS in NG and CuZn-NG. The atomic charge changes ( $\Delta|e|$ ) of first CS and second CS when CoNi atoms embedded in NG.

|             |           | N <sub>P</sub> G | CuZn-N <sub>P</sub> G | N <sub>PA</sub> G | CuZn-N <sub>PA</sub> G |
|-------------|-----------|------------------|-----------------------|-------------------|------------------------|
| $ e $       | first CS  | -6.90            | -7.61                 | -5.60             | -7.26                  |
|             | second CS | 7.12             | 5.79                  | 5.73              | 5.31                   |
| $\Delta e $ | first CS  |                  | -0.71                 |                   | -1.66                  |
|             | second CS |                  | -1.33                 |                   | -0.42                  |

**Table S3** Adsorption energy ( $E_{ads}$ ) of H<sub>2</sub>O and H<sub>2</sub>O<sub>2</sub> molecule.

| Species                |                               | $E_{ads}$ (eV) |
|------------------------|-------------------------------|----------------|
| CuZn-N <sub>P</sub> G  | H <sub>2</sub> O <sub>2</sub> | -0.33          |
|                        | H <sub>2</sub> O              | -0.41          |
| CuZn-N <sub>PA</sub> G | H <sub>2</sub> O <sub>2</sub> | -0.28          |
|                        | H <sub>2</sub> O              | -0.33          |

**Table S4** The atomic charge ( $|e|$ ) and d-band center (eV) during methane oxidation to methanol.

| Species                      | d-band center of Cu (eV) | d-band center of Zn (eV) | Atomic charge of Cu ( $ e $ ) | Atomic charge of Zn ( $ e $ ) |
|------------------------------|--------------------------|--------------------------|-------------------------------|-------------------------------|
| CuZn-N <sub>p</sub> G ( I )  | -2.93                    | -7.27                    | 0.60                          | 1.02                          |
| II                           | -2.96                    | -7.06                    | 0.64                          | 1.08                          |
| III                          | -2.59                    | -5.70                    | 0.90                          | 1.19                          |
| IV                           | -2.48                    | -5.70                    | 0.88                          | 1.18                          |
| V                            | -2.50                    | -5.70                    | 0.88                          | 1.18                          |
| VI                           | -2.15                    | -6.23                    | 0.77                          | 1.16                          |
| VII                          | -2.74                    | -6.95                    | 0.61                          | 1.09                          |
| CuZn-N <sub>PA</sub> G ( I ) | -4.27                    | -6.52                    | 0.94                          | 1.18                          |
| II                           | -4.30                    | -6.40                    | 0.95                          | 1.22                          |
| III                          | -3.82                    | -5.43                    | 0.99                          | 1.24                          |
| IV                           | -3.73                    | -5.52                    | 1.01                          | 1.22                          |
| V                            | -3.78                    | -5.48                    | 1.00                          | 1.22                          |
| VI                           | -3.94                    | -4.95                    | 0.95                          | 1.24                          |
| VII                          | -4.29                    | -6.15                    | 0.95                          | 1.24                          |

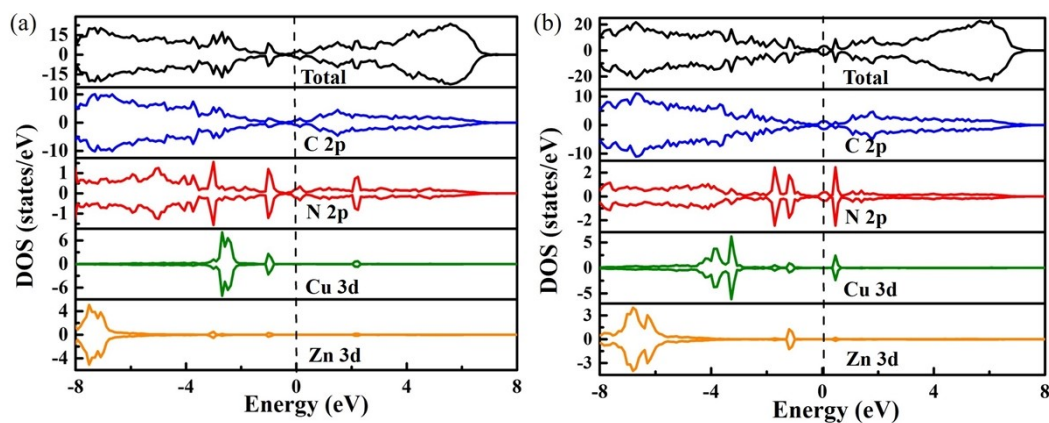

**Fig. S1** Spin-polarized density of states for (a) CuZn-N<sub>p</sub>G, (b) CuZn-N<sub>PA</sub>G.

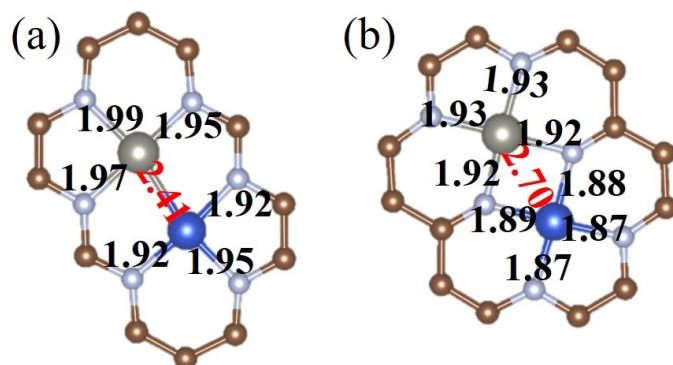

**Fig. S2** The geometric structures and the mainly bonds lengths (Å) of (a) CuZn-N<sub>p</sub>G and (b) CuZn-N<sub>pA</sub>G.

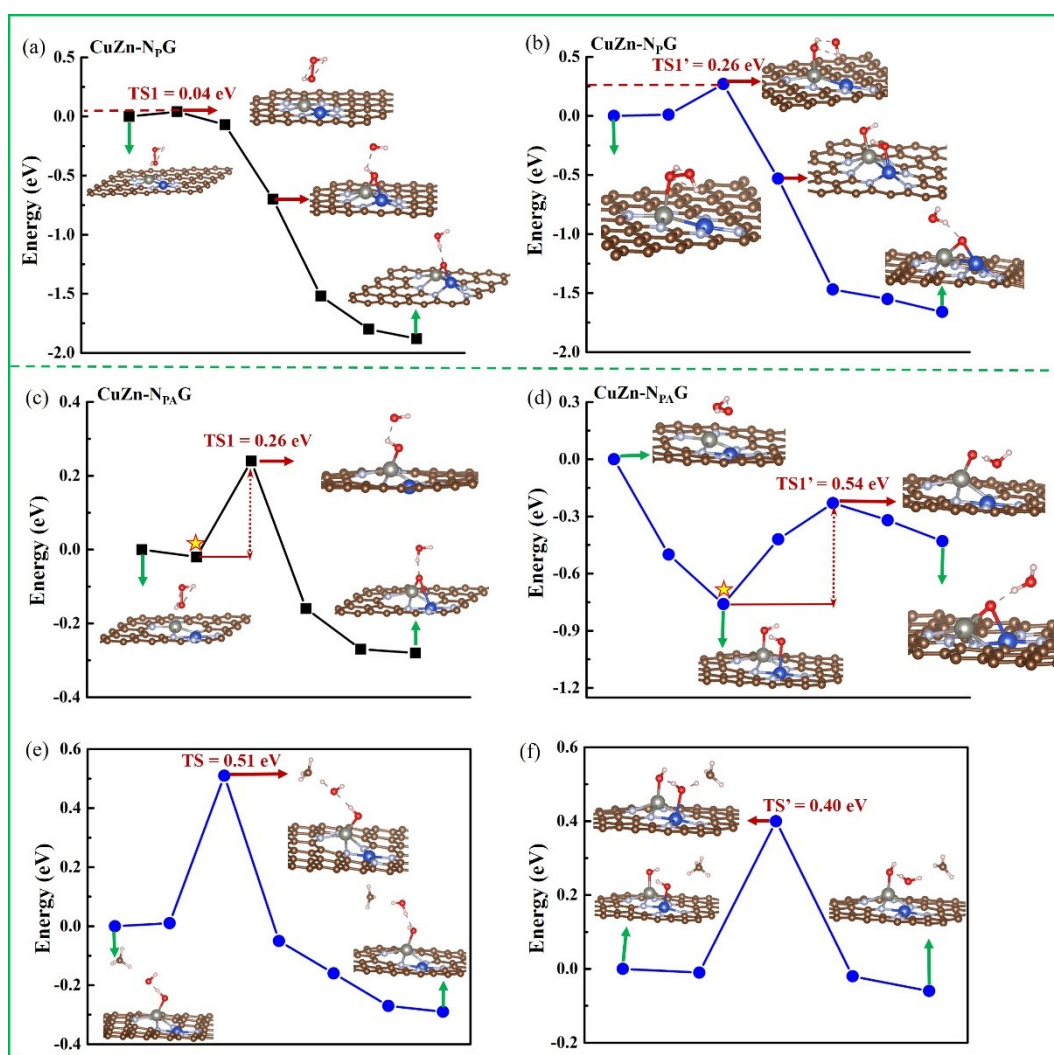

**Fig. S3** Reaction pathway for H<sub>2</sub>O<sub>2</sub> oxidizes CuZn atoms on (a, b) CuZn-N<sub>p</sub>G, and (c, d) CuZn-N<sub>pA</sub>G. The reaction pathway of (e, f) OH\* activation of CH<sub>4</sub>.

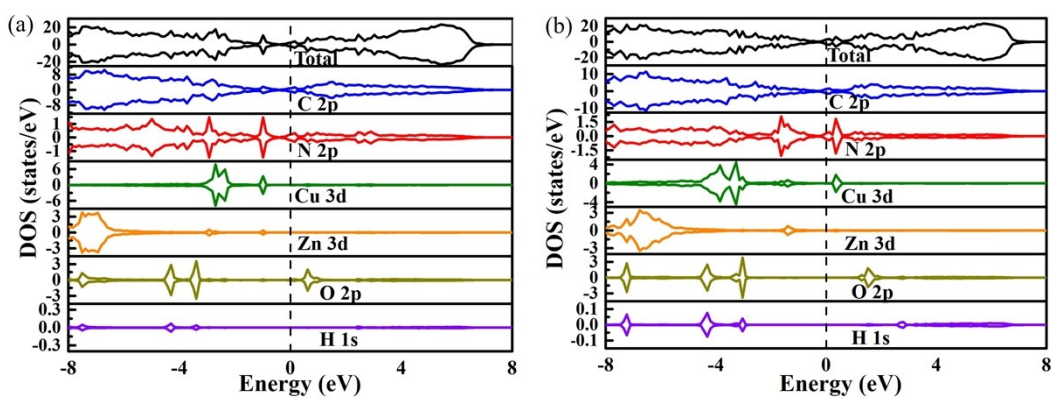

**Fig. S4** Spin-polarized density of states for (a) CuZn-N<sub>p</sub>G, (b) CuZn-N<sub>pA</sub>G after adsorption H<sub>2</sub>O<sub>2</sub> (II-state).

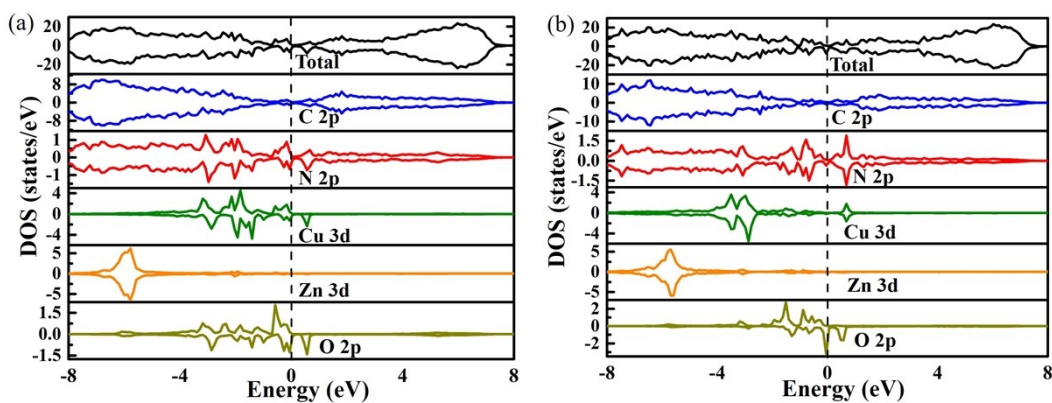

**Fig. S5** Spin-polarized density of states for (a) CuZn-N<sub>p</sub>G-O, (b) CuZn-N<sub>pA</sub>G-O (IV-state).

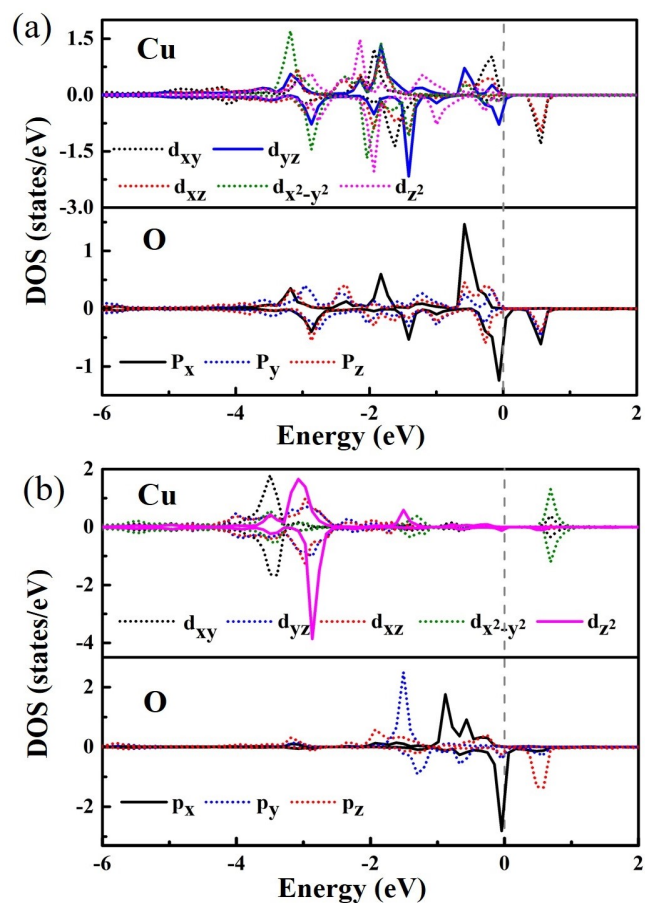

**Fig. S6** Spin-polarized density of states of Cu 3d and O 2p split orbitals for (a) CuZn-N<sub>p</sub>G-O, (b) CuZn-N<sub>pA</sub>G-O (IV-state).

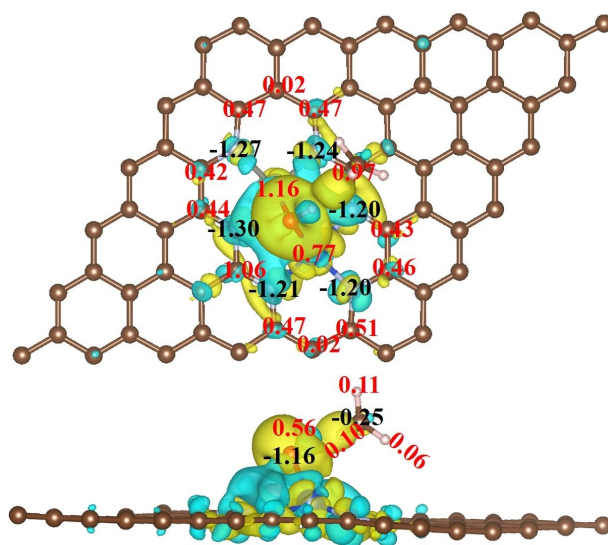

**Fig. S7** The Bader charge analysis and the 3D charge density differences for CuZn-N<sub>p</sub>G after the activation of C-H bond (VI-state), the isosurface value is 0.003 e bohr<sup>-3</sup>.



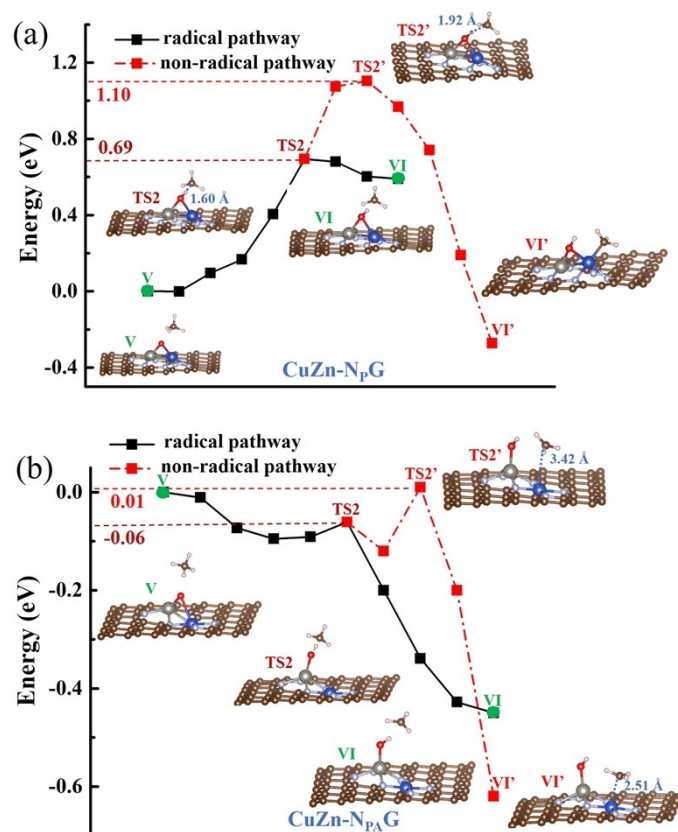

**Fig. S8** The radical pathway and non-radical pathway for methane oxidation on (a) CuZn-N<sub>p</sub>G-O and (b) CuZn-N<sub>pA</sub>G-O.

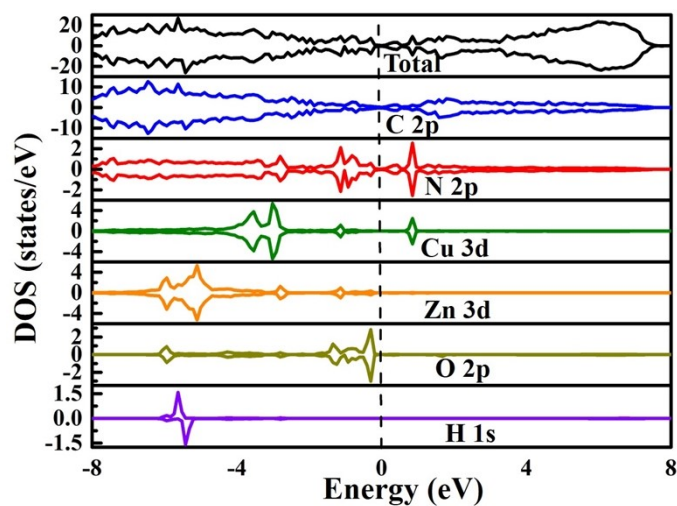

**Fig. S9** Spin-polarized density of states for CuZn-N<sub>pA</sub>G after the activation of C-H bond (VI-state).



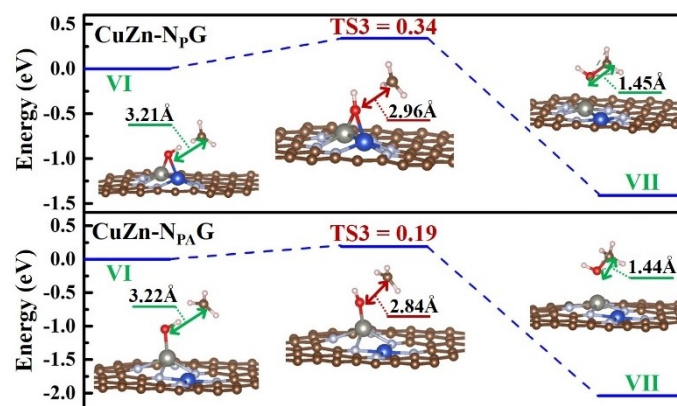

**Fig. S10** Energy profile of methanol formation reaction as well as the structures of TS3, VI- and VII-state.

**Table S5**  $\Delta E$  (eV), energy difference between X-state and I-state, X= II, TS1, V, TS2,VI, TS3. Atomic charge of Cu center ( $|e|$ ), energy barrier (eV) and change in atomic charge of Cu center ( $|e|$ ).

| Species                         | $\Delta E$<br>(eV) | Atomic charge<br>of Cu ( $ e $ ) | Energy<br>barrier (eV) | Change in atomic<br>charge of Cu ( $ e $ ) |
|---------------------------------|--------------------|----------------------------------|------------------------|--------------------------------------------|
| <b>CuZn-N<sub>p</sub>G(II)</b>  | -0.33              | 0.64                             |                        |                                            |
| TS1                             | -0.29              | 0.63                             | 0.04                   | -0.01                                      |
| V                               | -1.99              | 0.88                             |                        |                                            |
| TS2                             | -1.30              | 0.79                             | 0.69                   | -0.09                                      |
| VI                              | -1.40              | 0.77                             |                        |                                            |
| TS3                             | -1.06              | 0.74                             | 0.34                   | -0.03                                      |
| <b>CuZn-N<sub>pA</sub>G(II)</b> | -0.28              | 0.95                             |                        |                                            |
| TS1                             | -0.04              | 0.97                             | 0.26                   | 0.02                                       |
| V                               | -0.30              | 1.00                             |                        |                                            |
| TS2                             | -0.36              | 0.96                             | -0.06                  | -0.04                                      |
| VI                              | -0.74              | 0.95                             |                        |                                            |
| TS3                             | -0.55              | 0.96                             | 0.19                   | 0.01                                       |

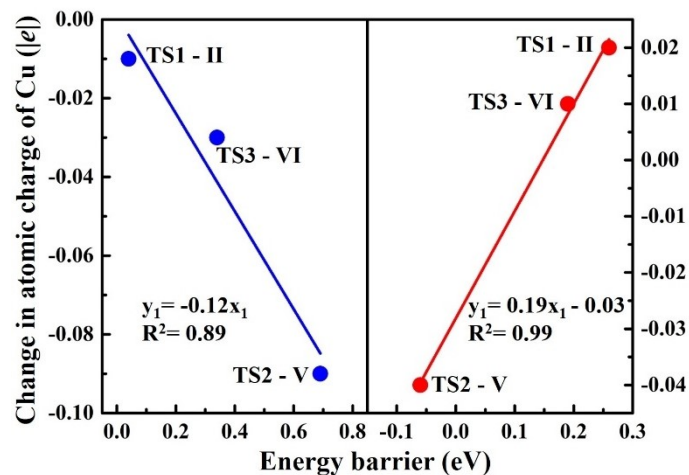

**Fig. S11** The relationship between change in atomic charge of Cu center and energy barrier.

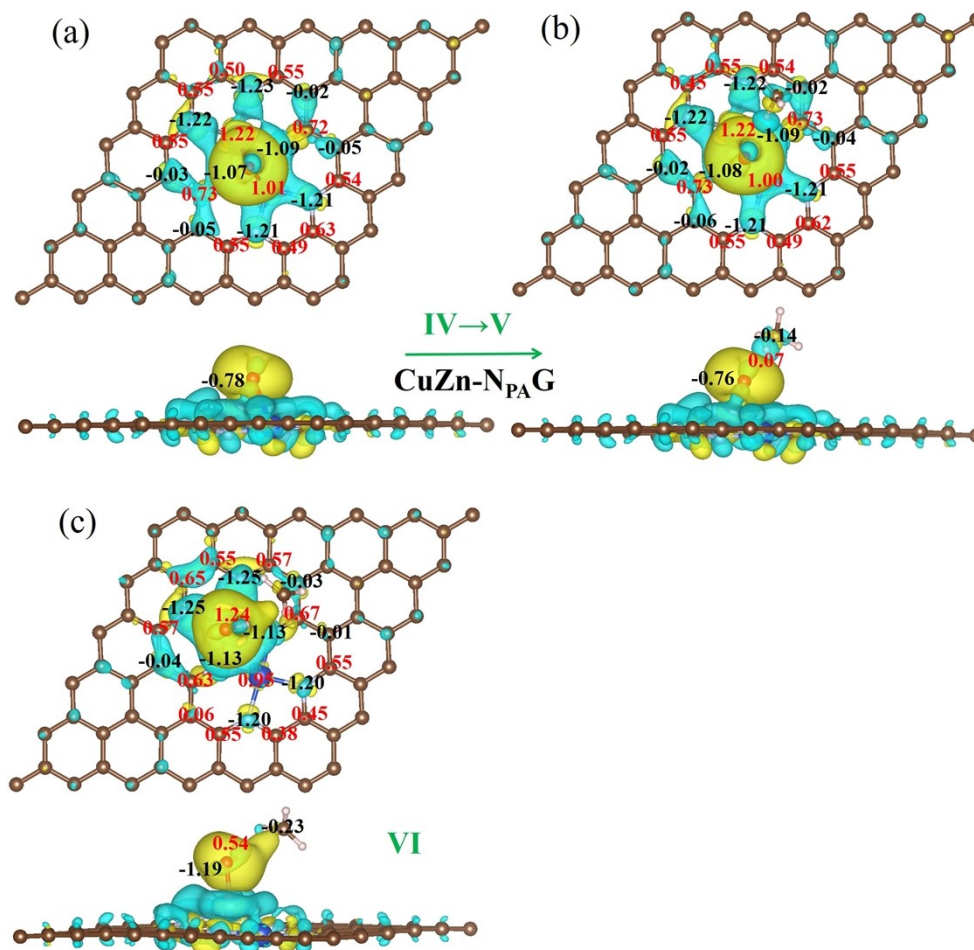

**Fig. S12** Bader charge analysis and the 3D charge density differences of CuZn-N<sub>PA</sub>G at (a) IV, (b) V and (c) VI-state, the isosurface value is 0.003 e bohr<sup>-3</sup>.

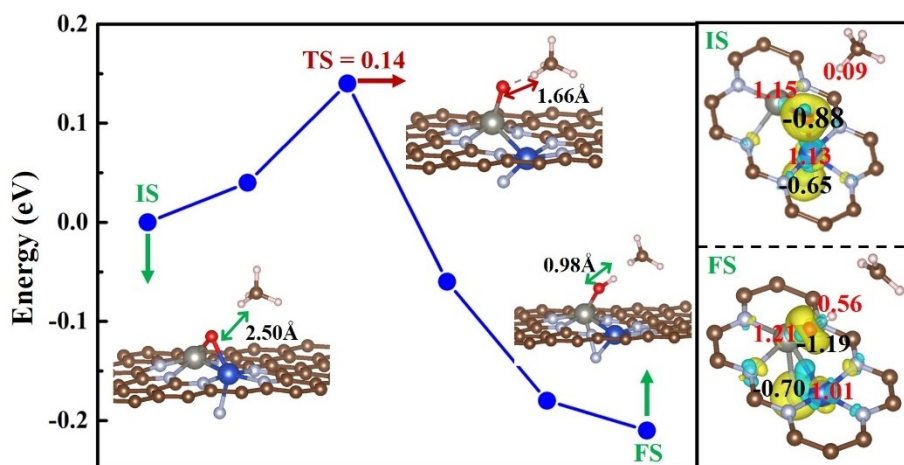

**Fig. S13** Reaction pathway for methane activation on F-CuZn-N<sub>p</sub>G-O. The Bader charge analysis and the 3D charge density differences for initial structure (IS) and final structure (FS), the isosurface value is 0.005 e bohr<sup>-3</sup>.

## References

- [S1] L. Liu, C. Chen, L. Zhao, Y. Wang, X. Wang, *Carbon*, 2017, **115**, 773-780.
- [S2] Y. Wei, L. Sun, M. Wang, J. Hong, L. Zou, H. Liu, et al. *Angew Chem. Int. Edit.*, 2020, **59**, 16013-16022.
- [S3] L. Ismer, M. Park, A. Janotti, C. Van de Walle, *Phys. Rev. B*, 2009, **80**, 184110.
- [S4] C. Van de Walle, J. Neugebauer, *J. Appl. Phys.*, 2004, **95**, 3851-3879.
- [S5] E. Finazzi, C. Di Valentin, A. Selloni, G. Pacchioni, *J. Phys. Chem. C*, 2007, **111**, 9275-9282.
- [S6] S. Kattel, P. Atanassov, B. Kiefer, *Phys. Chem. Chem. Phys.*, 2014, **16**, 13800-13806.
- [S7] C. Zhang, S. Qin, B. Li, P. Jin, *J. Mater. Chem. A*, 2022, **10**, 8309-8323.
- [S8] X. Guo, J. Gu, S. Lin, S. Zhang, Z. Chen, S. Huang, *J. Am. Chem. Soc.*, 2020, **142**, 5709-5721.
